# Supplementary material for: Surgical treatment of cryptorchidism: current insights and future directions
Source: PubMed Central journal article supplement (PMC10940471; doi:10.3389/fendo.2024.1327957), 2024-03-01
Supplement: DataSheet_1.pdf [file DataSheet_1.pdf]

| <b>Study</b>      | <b>Operation</b> | <b>Success rate</b> |
|-------------------|------------------|---------------------|
| Penson et al.(46) | One-stage FS     | 79%                 |
|                   | Two-stage FS     | 86%                 |
| Wayne et al.(45)  | One-stage FS     | 80%                 |
|                   | Two-stage FS     | 85%                 |
| Gates et al.(39)  | One-stage FS     | 86%                 |
|                   | Two-stage FS     | 91%                 |
| Tian et al.(47)   | Two-stage FS     | 66%                 |
|                   | Shehata          | 87%                 |
