# Supplementary material for: Surgical treatment of cryptorchidism: current insights and future directions
Source: PubMed Central journal article supplement (PMC10940471; doi:10.3389/fendo.2024.1327957), 2024-03-01
Supplement: DataSheet_2.pdf [file DataSheet_2.pdf]

| <b>Study</b>     | <b>Operation</b> | <b>No atrophy</b> | <b>No ascent</b> |
|------------------|------------------|-------------------|------------------|
| Braga et al.(48) | One-stage FS     | 69%               | n/a              |
|                  | Two-stage FS     | 72%               | n/a              |
|                  | Two-stage GSLO   | 99%               | 91%              |
| Roy et al.(49)   | All two-stage LO | 92%               | 94%              |
| Zhou et al.(50)  | Two-stage GSLO   | 99%               | 97%              |
|                  | Two-stage GSOO   | 98%               | 97%              |
